# Supplementary material
Source: HighWire-hosted journal article supplement (https://www.qdcxjkg.com/highwire/filestream/114094/field_highwire_adjunct_files/0/Online_supplement_-_Arm_span_and_height.pdf)
Supplement: Online_supplement_-_Arm_span_and_height.pdf [file Online_supplement_-_Arm_span_and_height.pdf]

## Online Supplement

### All-age relationship between arm span and height in different ethnic groups

|                      |                                                                                                                                                                                       |
|----------------------|---------------------------------------------------------------------------------------------------------------------------------------------------------------------------------------|
| Philip H. Quanjer    | Department of Pulmonary Diseases, and Dept of Paediatrics, division Respiratory Medicine, Erasmus University Medical Centre – Sophia Children’s Hospital, Rotterdam, the Netherlands. |
| André Capderou       | Université Paris-Sud, Faculté de Médecine Paris-Sud, Centre Chirurgical Marie Lannelongue, Service Physiologie, and INSERM U 999, Le Plessis Robinson, France                         |
| Mumtaz M. Mazicioglu | Erciyes Üniversitesi Tıp fakültesi Aile hekimliği Anabilim Dalı Melikgazi-Kayseri, Turkey                                                                                             |
| Ashutosh N. Aggarwal | Department of Pulmonary Medicine, Postgraduate Institute of Medical Education and Research, Chandigarh 160012 India                                                                   |
| Sudip Datta Banik    | Department of Human Ecology. Centro de Investigación y de Estudios Avanzados (Cinvestav) del Instituto Politecnico Nacional (IPN), Mérida. Yucatan, Mexico.                           |
| Stevo Popovic        | University of Montenegro, Faculty for Sport and Physical Education, Niksic, Montenegro                                                                                                |
| Francis A. K. Tayie  | Department of Human Environmental Studies, Central Michigan University, Mount Pleasant, MI, USA                                                                                       |
| Mohammad Golshan     | Dept. of Medicine, School of Medicine, Isfahan University of Medical Sciences, Iran                                                                                                   |
| Mary S.M. Ip         | Department of Medicine, The University of Hong Kong, Pokfulam, Hong Kong, China                                                                                                       |
| Marc Zelter          | Université Pierre et Marie Curie, and Assistance Publique, Hôpitaux de Paris, Groupe Hospitalier Pitié-Salpêtrière, Paris, France                                                     |

Online supplement

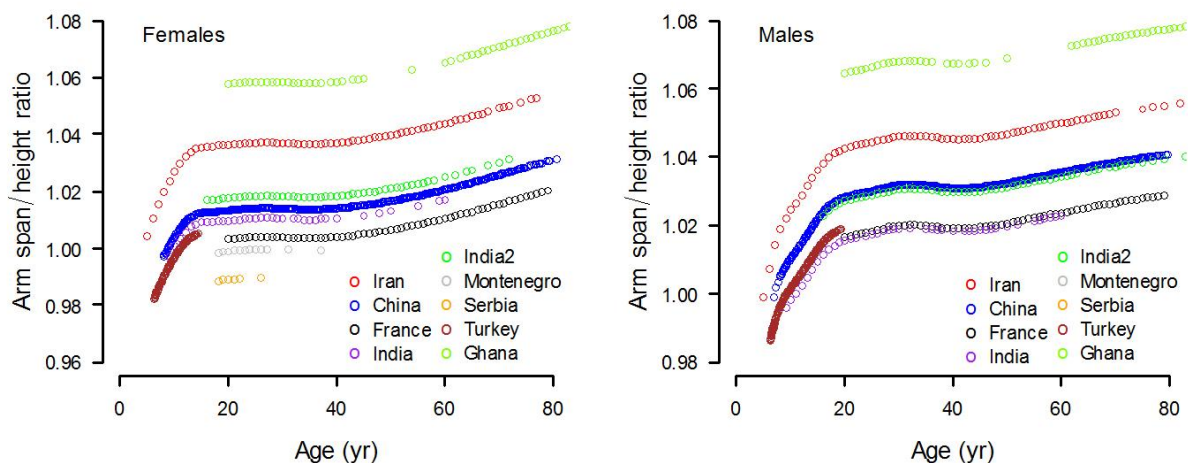

Figure E-1. Arm span/standing height ratio as a function of age in males and females, for each of the 9 sites contributing data.

Table E-1. Agreement between the number of French patients classified with a z-score below (low) or above (normal) -1.645 for FEV<sub>1</sub>, FVC or FEV<sub>1</sub>/FVC, or a restrictive pattern (FEV<sub>1</sub>/FVC z-score > -1.645 FVC < -1.645). Calculations were performed using measured and predicted height.

|                                                      |        |                              |                       |        |
|------------------------------------------------------|--------|------------------------------|-----------------------|--------|
|                                                      |        | <b>Using measured height</b> |                       |        |
|                                                      |        | FEV <sub>1</sub>             |                       |        |
|                                                      |        | low                          | normal                |        |
| <b>Using height calculated from arm span and age</b> | low    | 329                          | 41                    |        |
|                                                      | normal | 22                           | 1111                  |        |
|                                                      |        |                              | FVC                   |        |
|                                                      |        |                              | low                   | normal |
|                                                      | low    | 169                          | 23                    |        |
|                                                      | normal | 25                           | 1286                  |        |
|                                                      |        |                              | FEV <sub>1</sub> /FVC |        |
|                                                      |        |                              | low                   | normal |
|                                                      | low    | 329                          | 6                     |        |
|                                                      | normal | 0                            | 1186                  |        |
|                                                      |        |                              | Restrictive pattern   |        |
|                                                      |        |                              | low                   | normal |
| low                                                  | 58     | 8                            |                       |        |
| normal                                               | 7      | 1430                         |                       |        |

Relationship between arm span and height in different ethnic groups

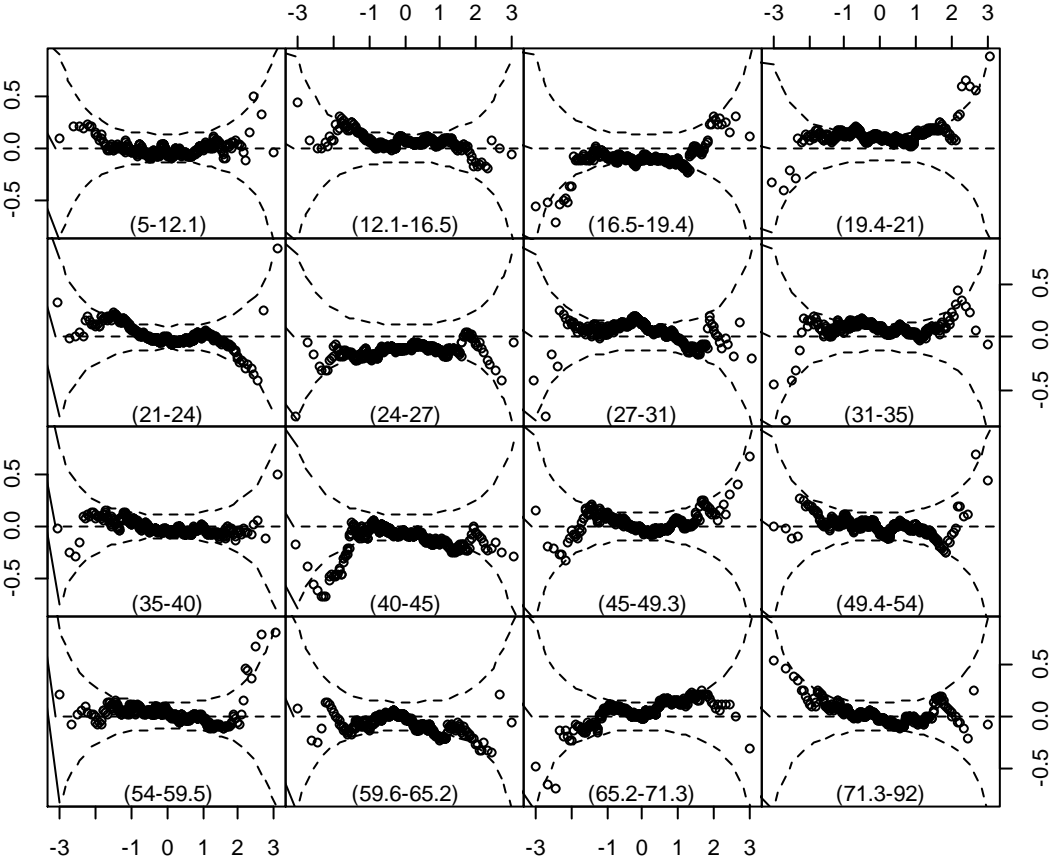

Fig E-2. Worm plot displaying the residuals within different age ranges. The residuals relate to the model of sitting height/standing height as a function of age and ethnic group in males.

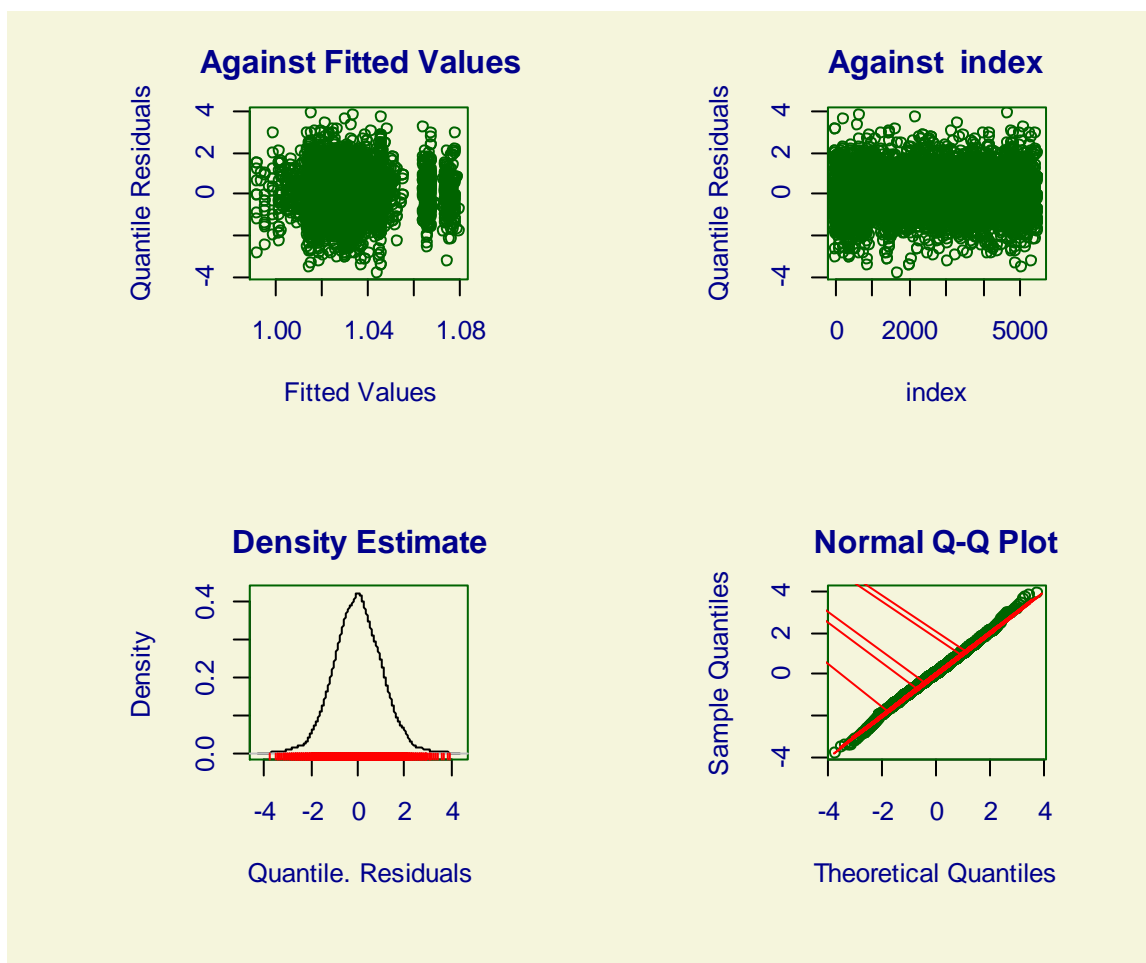

Fig. E-3. Normal probability (Q-Q) plot and other quantile distributions which allow to judge the goodness of fit to the data of the model for the standing height/height ratio in males as a function of age and ethnic group. In case of a good fit the quantile residuals should be symmetrically distributed (*i.e.* equal variance) around an average = 0, the density plot should suggest a Gaussian distribution, and the plot of theoretical quantiles and quantiles from the fitted sample should lie on a line  $y=x$ .

Relationship between arm span and height in different ethnic groups

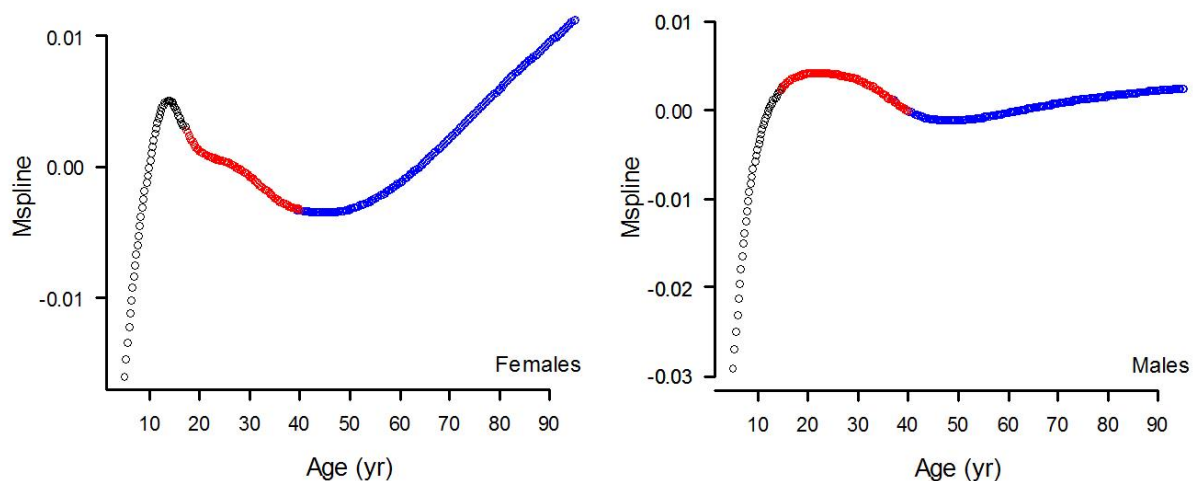

Figure E-4. Mspline represented by three polynomials for the 5-95 year age range. The explained variance ( $r^2$ ) between measured and derived Mspline varied between 0.9997 and 1 in females, and between 0.9995 and 1 in males.
